# Supplementary material
Source: publisher site journal article supplement (https://www.dovepress.com/article/530148)
Supplement: Supplementary file 1 [file 530148%20Revised%20Supplementary%20material.docx]

**Supplementary Information**

***1. TEM and SEM of PC.***


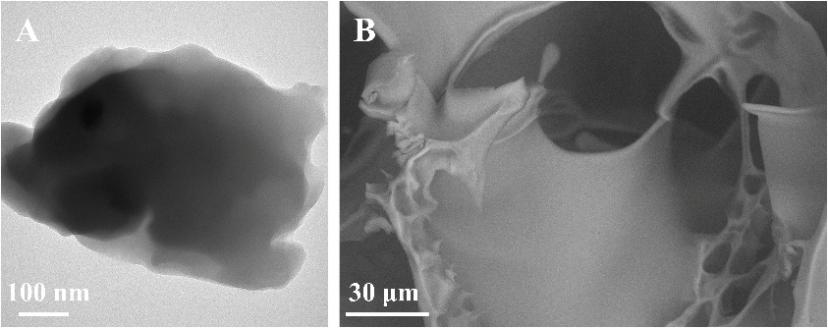


**Figure S1** A) TEM image of PC. B) SEM image of PC.

***2. EDS of PCA, PA, and CA.***


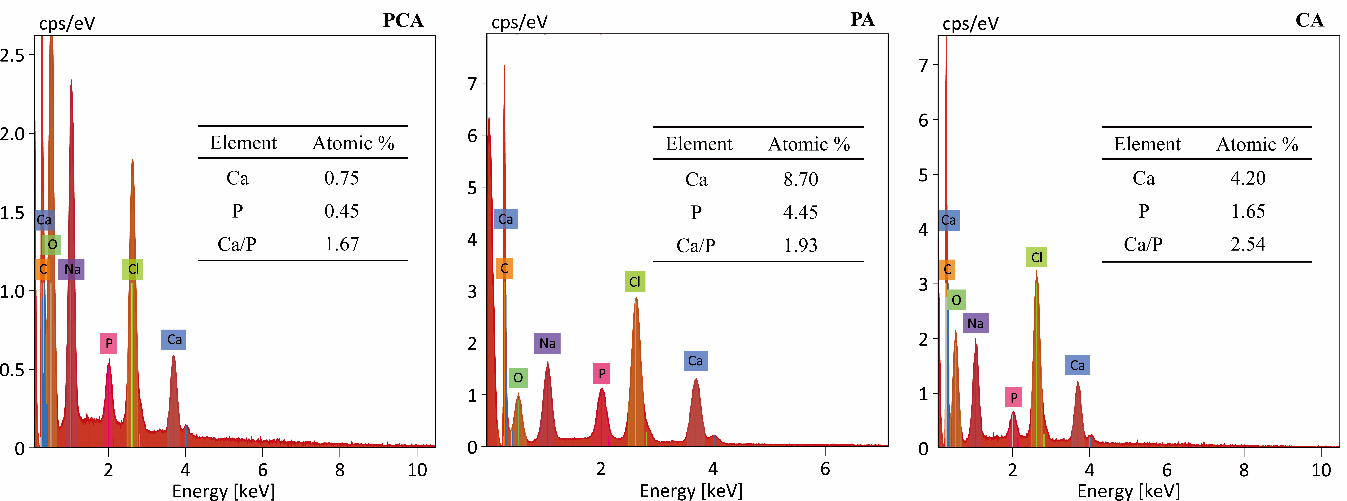


**Figure S2** EDS images of PCA, PA, and CA.

***3. FTIR of PC.***

**Figure S3** FTIR spectra of PC.

***4. Isolation of HDPSCs Using the Tissue Explant Method.***


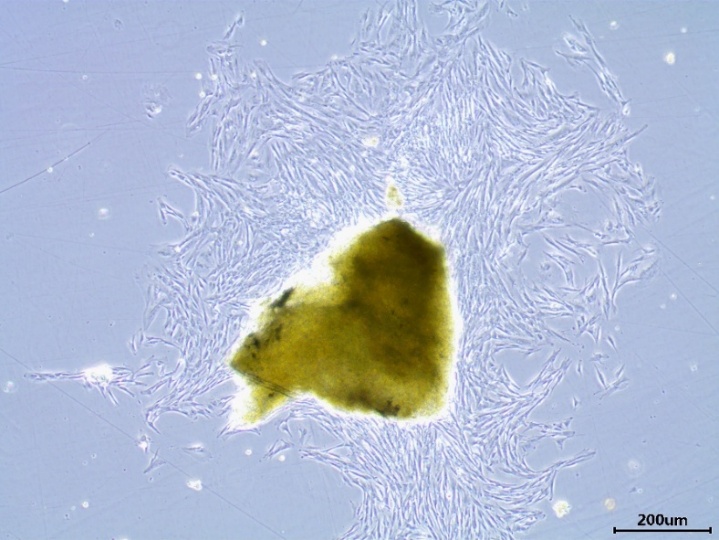


**Figure S4** Morphological Characterization of HDPSCs Isolated via Tissue Explant.

***5. Flow Cytometric Analysis of HDPSCs.***


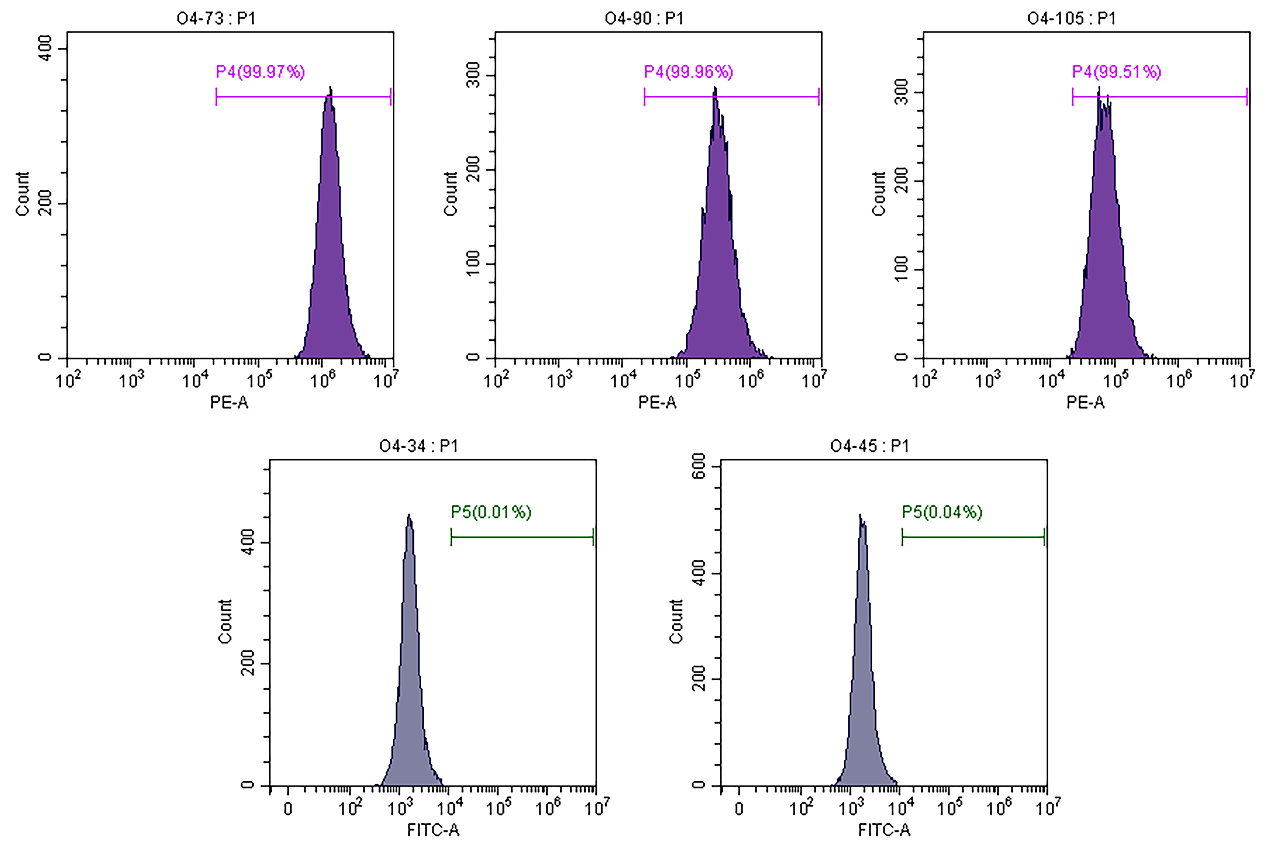


**Figure S5** Flow Cytometric Analysis of Surface Markers in HDPSCs.
